# Supplementary material for: Halogen-induced core structural evolution of four dinuclear copper(i) luminescent coordination compounds
Source: Royal Society of Chemistry journal article supplement (doi:10.1039/d2ce00793b), 2022-01-01
Supplement: d2ce00793b1.pdf [file d2ce00793b1.pdf]

## Halogen-induced Core Structural Evolution of Four Dinuclear Copper(I) Luminescent Coordination Compounds

Na Li,<sup>a</sup> Chunhong Tan,<sup>\*a,b</sup> Yi Feng,<sup>a</sup> Lu Cheng,<sup>a</sup> Meng Cao,<sup>a</sup> Yunkai Sun<sup>\*c</sup> and Xiao-Feng Wang<sup>\*a</sup>

<sup>a</sup>School of Chemistry and Chemical Engineering, University of South China, Hengyang, 421001, Hunan, P. R. China, E-mail: xfwang518@sina.cn

<sup>b</sup>State Key Laboratory of Structure Chemistry, Fujian Institute of Research on the Structure of Matter, Chinese Academy of Sciences, Fuzhou, 350002, P. R. China, E-mail: 2015002077@usc.edu.cn

<sup>c</sup>School of Chemistry and Materials Science, Changzhou Institute of Technology, Changzhou, 213022, Jiangsu, P. R. China, [sunyunkai1983@163.com](mailto:sunyunkai1983@163.com)

**Table S1.** Crystallographic data for complexes **1a-3b**.

| Complex                            | 1a                                                                                                           | 2a                                                                                               | 2b                                                                                            | 3b                                                                                           |
|------------------------------------|--------------------------------------------------------------------------------------------------------------|--------------------------------------------------------------------------------------------------|-----------------------------------------------------------------------------------------------|----------------------------------------------------------------------------------------------|
| Formula                            | C <sub>51</sub> H <sub>44</sub> N <sub>3</sub> Cl <sub>2</sub> O <sub>5</sub> P <sub>3</sub> Cu <sub>2</sub> | C <sub>51</sub> H <sub>42</sub> N <sub>3</sub> ClBrO <sub>4</sub> P <sub>3</sub> Cu <sub>2</sub> | C <sub>51</sub> H <sub>42</sub> N <sub>3</sub> Br <sub>2</sub> P <sub>3</sub> Cu <sub>2</sub> | C <sub>51</sub> H <sub>42</sub> N <sub>3</sub> I <sub>2</sub> P <sub>3</sub> Cu <sub>2</sub> |
| Mr                                 | 1069.78                                                                                                      | 1096.22                                                                                          | 1076.68                                                                                       | 1170.66                                                                                      |
| Cryst system                       | trigonal                                                                                                     | trigonal                                                                                         | monoclinic                                                                                    | triclinic                                                                                    |
| Space group                        | <i>P</i> -3 <i>c</i> 1                                                                                       | <i>P</i> -3 <i>m</i> 1                                                                           | <i>P</i> 2 <sub>1</sub> / <i>n</i>                                                            | <i>P</i> -1                                                                                  |
| a/Å                                | 13(3)                                                                                                        | 12.803(9)                                                                                        | 14.256(9)                                                                                     | 13.615(5)                                                                                    |
| b/Å                                | 13(3)                                                                                                        | 12.803(9)                                                                                        | 18.240(1)                                                                                     | 13.933(7)                                                                                    |
| c/Å                                | 39(4)                                                                                                        | 19.257(2)                                                                                        | 17.675(1)                                                                                     | 15.790(6)                                                                                    |
| α/°                                | 90.000                                                                                                       | 90.000                                                                                           | 90                                                                                            | 103.40(2)                                                                                    |
| β/°                                | 90.000                                                                                                       | 90.000                                                                                           | 98.596(1)                                                                                     | 102.005(2)                                                                                   |
| γ/°                                | 120.00                                                                                                       | 120.000                                                                                          | 90                                                                                            | 117.440(2)                                                                                   |
| V/Å <sup>3</sup>                   | 5708(5)                                                                                                      | 2733(2)                                                                                          | 4544(5)                                                                                       | 2407.7(2)                                                                                    |
| Z                                  | 4                                                                                                            | 2                                                                                                | 4                                                                                             | 2                                                                                            |
| D <sub>c</sub> /g cm <sup>-3</sup> | 1.219                                                                                                        | 1.332                                                                                            | 1.574                                                                                         | 1.615                                                                                        |
| μ/mm <sup>-1</sup>                 | 0.945                                                                                                        | 1.688                                                                                            | 2.840                                                                                         | 2.303                                                                                        |
| F(000)                             | 2144                                                                                                         | 1112                                                                                             | 2168                                                                                          | 1156                                                                                         |
| R(int)                             | 0.0613                                                                                                       | 0.0675                                                                                           | 0.0519                                                                                        | 0.0427                                                                                       |
| Total reflections                  | 17180                                                                                                        | 21482                                                                                            | 34734                                                                                         | 18618                                                                                        |
| Unique reflections                 | 3660                                                                                                         | 2356                                                                                             | 10258                                                                                         | 10792                                                                                        |
| <i>I</i> > 2σ( <i>I</i> )          | 2050                                                                                                         | 1986                                                                                             | 7462                                                                                          | 7023                                                                                         |
| R <sub>1</sub>                     | 0.0930                                                                                                       | 0.0559                                                                                           | 0.0497                                                                                        | 0.0592                                                                                       |
| wR <sub>2</sub>                    | 0.3235                                                                                                       | 0.1384                                                                                           | 0.1078                                                                                        | 0.1625                                                                                       |
| S                                  | 1.096                                                                                                        | 1.136                                                                                            | 1.050                                                                                         | 1.077                                                                                        |

**Table S2.** Selected Bond Distances (Å) and Angles (deg) of [Cu<sub>2</sub>(μ-dppy)<sub>3</sub>Cl]ClO<sub>4</sub>·H<sub>2</sub>O (**1a**)

---

| bond distances        |            |                    |           |
|-----------------------|------------|--------------------|-----------|
| Cu(2)-N(1)            | 1.992(6)   | Cu(1)-Cl(2)        | 2.304(2)  |
| Cu(2)-Cu(1)           | 2.782(2)   | Cu(1)-P(1)         | 2.324 (2) |
| angles                |            |                    |           |
| N(1)#1-Cu(2)-N(1)#2   | 61.9(3)    | P(1)#1-Cu(1)-Cu(2) | 75.21(3)  |
| N(1)#1-Cu(2)-N(1)     | 116.94(9)  | C(1)-N(1)-Cu(2)    | 119.7(5)  |
| N(1)#2-Cu(2)-N(1)     | 56.0(3)    | C(5)-N(1)-Cu(2)    | 121.5(5)  |
| N(1)#1-Cu(2)-N(1)#4   | 159.4(3)   | N(1)#2-N(1)-Cu(2)  | 62.02(2)  |
| N(1)#2-Cu(2)-N(1)#4   | 116.94(9)  | C(17)#4-N(1)-Cu(2) | 143.5(5)  |
| N(1)#5-Cu(2)-Cu(1)    | 100.19(14) | C(12)-P(1)-Cu(1)   | 121.9(2)  |
| Cl(2)-Cu(1)-P(1)#1    | 104.79(3)  | C(6)-P(1)-Cu(1)    | 113.27(2) |
| P(1)#1-Cu(1)-P(1)     | 113.72(3)  | C(5)-P(1)-Cu(1)    | 111.6(2)  |
| Cl(2)-Cu(1)-Cu(2)     | 180        |                    |           |
| torsion angles        |            |                    |           |
| N(1)-Cu(2)-Cu(1)-P(1) | 31.50(2)   |                    |           |

---

<sup>a</sup>Symmetry transformations used to generate equivalent atoms: #1 = -x+y, -x+1, z; #2 = x, x-y+1, z; #3 = -y+1, -x+1, z; #4 = -x+y, y, z; #5 = -y+1, x-y+1, z; #6 = -y, -x, z.

<sup>b</sup>Torsion angle around the Cu2-Cu1-Cl1 axis in a four-membered ring Cu<sub>2</sub>NP.

---

**Table S3.** Selected Bond Distances (Å) and Angles(deg) of [Cu<sub>2</sub>(μ-dppy)<sub>3</sub>Br]ClO<sub>4</sub>·H<sub>2</sub>O (2a)

---

| bond distances        |            |                   |           |
|-----------------------|------------|-------------------|-----------|
| Cu(2)-N(1)            | 1.983(7)   | Cu(1)-Br(1)       | 2.441(2)  |
| Cu(2)-Cu(1)           | 2.751(2)   | Cu(1)-P(1)        | 2.326(2)  |
| angles                |            |                   |           |
| N(1)#1-Cu(2)-N(1)#2   | 61.3(4)    | P(1)#1-Cu(1)-P(1) | 114.00(4) |
| N(1)#1-Cu(2)-N(1)     | 117.10(11) | Br(1)-Cu(1)-Cu(2) | 180       |
| N(1)#2-Cu(2)-N(1)     | 56.7(4)    | P(1)-Cu(1)-Cu(2)  | 75.57(5)  |
| N(1)#1-Cu(2)-N(1)#3   | 56.7(4)    | C(12)-P(1)-Cu(1)  | 121.1(3)  |
| N(1)-Cu(2)-N(1)#3     | 160.0(4)   | C(6)-P(1)-Cu(1)   | 113.6(2)  |
| N(1)#1-Cu(2)-Cu(1)    | 99.92(2)   | C(5)-P(1)-Cu(1)   | 110.8(3)  |
| Br(1)-Cu(1)-P(1)#1    | 104.43(5)  |                   |           |
| torsion angles        |            |                   |           |
| N(1)-Cu(2)-Cu(1)-P(1) | 31.19(2)   |                   |           |

---

<sup>a</sup>Symmetry transformations used to generate equivalent atoms: #1 = x+y, -x+1, z; #2 = x, x-y+1, z; #3 = -y+1, -x+1, z; #4 = -x+y, y, z; #5 = -y+1, x-y+1, z; #6 = -y, -x, z.

<sup>b</sup>Torsion angle around the Cu2-Cu1-Br1 axis in a four-membered ring Cu<sub>2</sub>NP.

---

**Table S4 . Selected Bond Distances (Å) and Angles (deg) of  $\text{Cu}_2(\mu\text{-Br})_2(\mu\text{-dppy})(\text{dppy})_2(\mathbf{2b})$** 

| bond distances    |            |                   |           |
|-------------------|------------|-------------------|-----------|
| Cu(1)-N(3)        | 2.095(4)   | Cu(2)-P(3)        | 2.2488(7) |
| Cu(1)-P(1)        | 2.2377(8)  | Cu(2)-P(2)        | 2.2618(6) |
| Cu(1)-Br(1)       | 2.5104(5)  | Cu(2)-Br(2)       | 2.5287(3) |
| Cu(1)-Br(2)       | 2.5434(2)  | Cu(2)-Br(1)       | 2.5686(3) |
| Cu(1)-Cu(2)       | 2.8937(8)  |                   |           |
| angles            |            |                   |           |
| N(3)-Cu(1)-P(1)   | 123.28(10) | P(2)-Cu(2)-Cu(1)  | 150.47(4) |
| N(3)-Cu(1)-Br(1)  | 111.35(10) | Br(2)-Cu(2)-Cu(1) | 55.45(3)  |
| P(1)-Cu(1)-Br(1)  | 104.73(5)  | Br(1)-Cu(2)-Cu(1) | 54.33(4)  |
| N(3)-Cu(1)-Br(2)  | 99.60(11)  | C(1)-P(1)-Cu(1)   | 116.04(5) |
| P(1)-Cu(1)-Br(2)  | 113.35(5)  | C(7)-P(1)-Cu(1)   | 118.83(5) |
| Br(1)-Cu(1)-Br(2) | 102.92(5)  | C(12)-P(1)-Cu(1)  | 113.38(6) |
| N(3)-Cu(1)-Cu(2)  | 90.41(10)  | C(24)-P(2)-Cu(2)  | 114.16(6) |
| P(1)-Cu(1)-Cu(2)  | 146.30(5)  | C(29)-P(2)-Cu(2)  | 118.09(6) |
| Br(1)-Cu(1)-Cu(2) | 56.22(2)   | C(18)-P(2)-Cu(2)  | 113.61(6) |
| Br(2)-Cu(1)-Cu(2) | 54.98(3)   | C(35)-P(3)-Cu(2)  | 116.63(5) |
| P(3)-Cu(2)-P(2)   | 124.42(6)  | C(41)-P(3)-Cu(2)  | 114.94(5) |
| P(3)-Cu(2)-Br(2)  | 104.20(4)  | C(47)-P(3)-Cu(2)  | 115.80(4) |
| P(2)-Cu(2)-Br(2)  | 108.90(5)  | C(51)-N(3)-Cu(1)  | 114.1(3)  |
| P(3)-Cu(2)-Br(1)  | 100.04(4)  | C(47)-N(3)-Cu(1)  | 128.7(3)  |
| P(2)-Cu(2)-Br(1)  | 114.90(5)  | Cu(1)-Br(1)-Cu(2) | 69.45(5)  |
| Br(2)-Cu(2)-Br(1) | 101.70(5)  | Cu(2)-Br(2)-Cu(1) | 69.57(4)  |
| P(3)-Cu(2)-Cu(1)  | 85.05(4)   |                   |           |

**Table S5. Selected Bond Distances (Å) and Angles (deg) of  $\text{Cu}_2(\mu\text{-I})_2(\mu\text{-dppy})(\text{dppy})_2(\mathbf{3b})$**

---

| bond distances   |           |                  |           |
|------------------|-----------|------------------|-----------|
| Cu(1)-N(3)       | 2.122(5)  | Cu(2)-P(3)       | 2.260(2)  |
| Cu(1)-P(1)       | 2.261(2)  | Cu(2)-P(2)       | 2.264(2)  |
| Cu(1)-I(2)       | 2.648(2)  | Cu(2)-I(1)       | 2.689(2)  |
| Cu(1)-I(1)       | 2.745(1)  | Cu(2)-I(2)       | 2.695(2)  |
| Cu(1)-Cu(2)      | 2.796(2)  |                  |           |
| angles           |           |                  |           |
| N(3)-Cu(1)-P(1)  | 117.6(2)  | C(1)-P(1)-C(6)   | 102.8(3)  |
| N(3)-Cu(1)-I(2)  | 113.9(2)  | C(12)-P(1)-C(6)  | 100.4(3)  |
| P(1)-Cu(1)-I(2)  | 108.6(6)  | C(1)-P(1)-Cu(1)  | 117.2(2)  |
| N(3)-Cu(1)-I(1)  | 100.2(2)  | C(12)-P(1)-Cu(1) | 115.8(2)  |
| P(1)-Cu(1)-I(1)  | 108.4(6)  | C(6)-P(1)-Cu(1)  | 114.4(2)  |
| I(2)-Cu(1)-I(1)  | 107.3(4)  | C(29)-P(2)-Cu(2) | 111.4(2)  |
| N(3)-Cu(1)-Cu(2) | 90.96(2)  | C(23)-P(2)-Cu(2) | 117.0(2)  |
| P(1)-Cu(1)-Cu(2) | 151.06(6) | C(18)-P(2)-Cu(2) | 115.6(2)  |
| I(2)-Cu(1)-Cu(2) | 59.27(4)  | C(35)-P(3)-Cu(2) | 116.1(2)  |
| I(1)-Cu(1)-Cu(2) | 58.06(4)  | C(41)-P(3)-Cu(2) | 116.7(2)  |
| P(3)-Cu(2)-P(2)  | 120.81(7) | C(47)-P(3)-Cu(2) | 113.7(2)  |
| P(3)-Cu(2)-I(1)  | 105.93(6) | P(2)-Cu(2)-Cu(1) | 152.22(6) |
| P(2)-Cu(2)-I(1)  | 109.95(7) | I(1)-Cu(2)-Cu(1) | 60.03(4)  |
| P(3)-Cu(2)-I(2)  | 103.71(6) | I(2)-Cu(2)-Cu(1) | 57.63(4)  |
| P(2)-Cu(2)-I(2)  | 108.10(6) | Cu(2)-I(1)-Cu(1) | 61.91(4)  |
| I(1)-Cu(2)-I(2)  | 107.57(4) | Cu(1)-I(2)-Cu(2) | 63.10(3)  |
| P(3)-Cu(2)-Cu(1) | 86.80(6)  |                  |           |

---

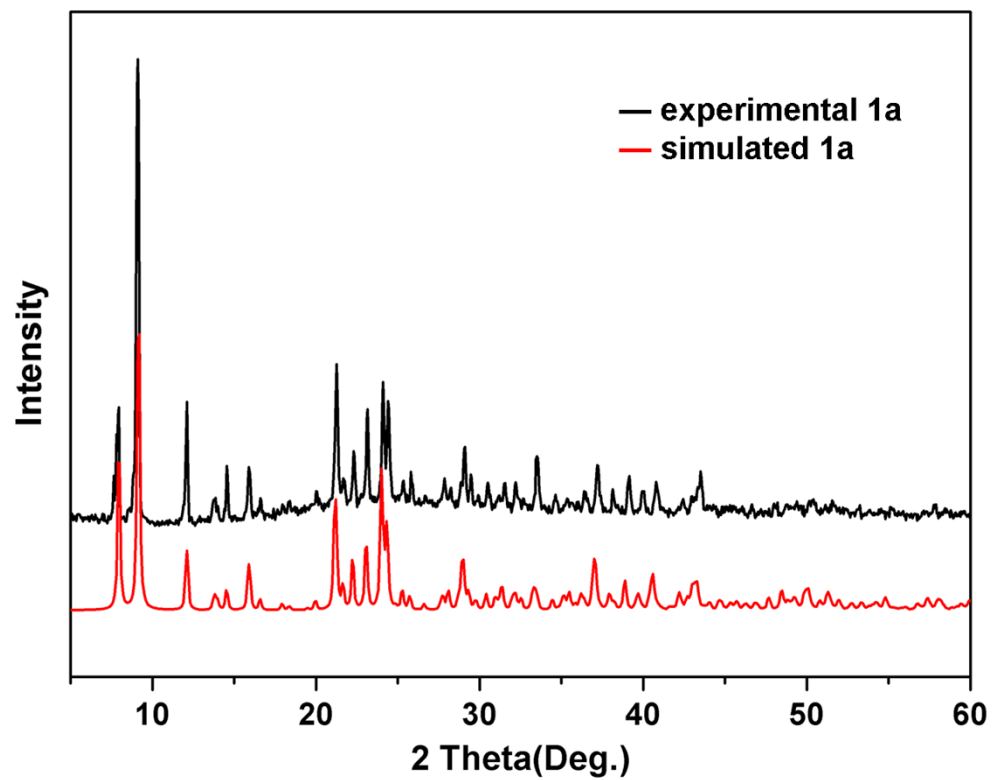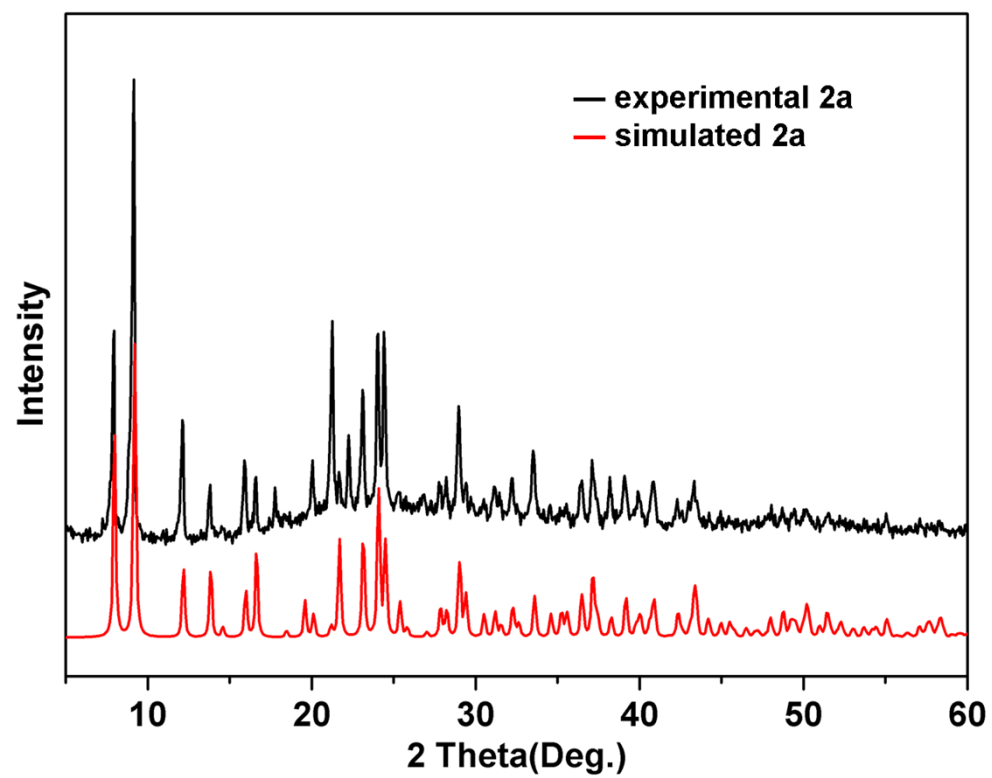

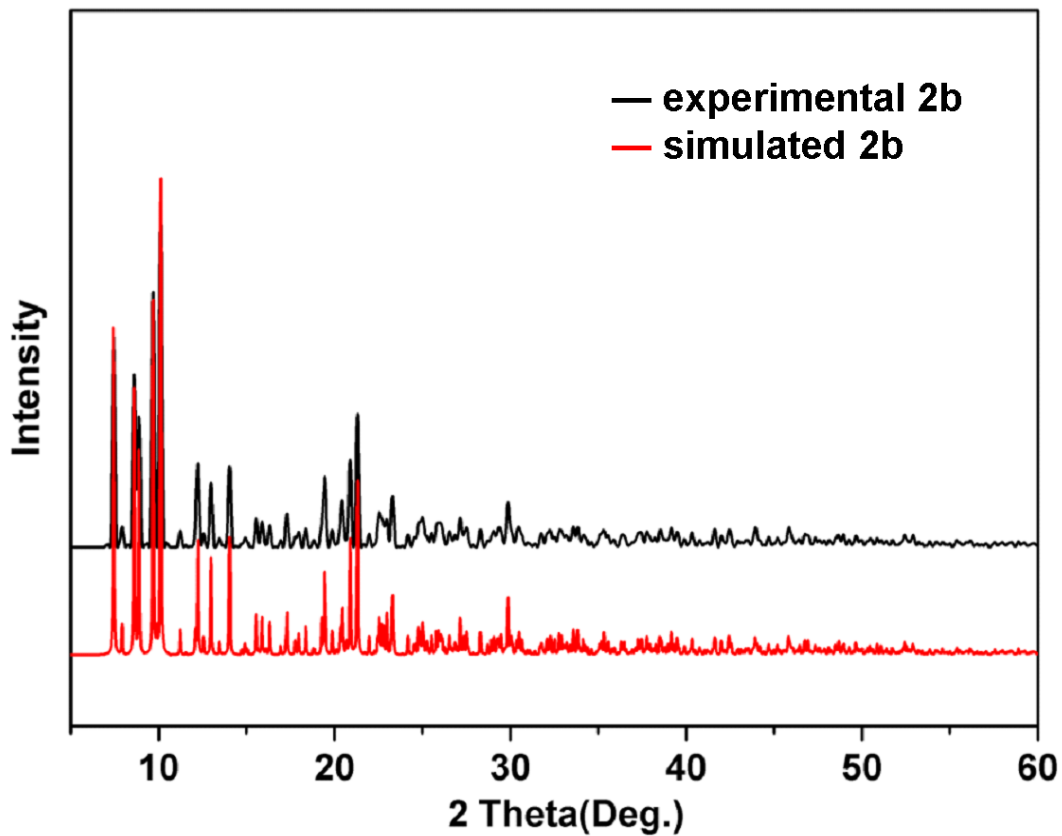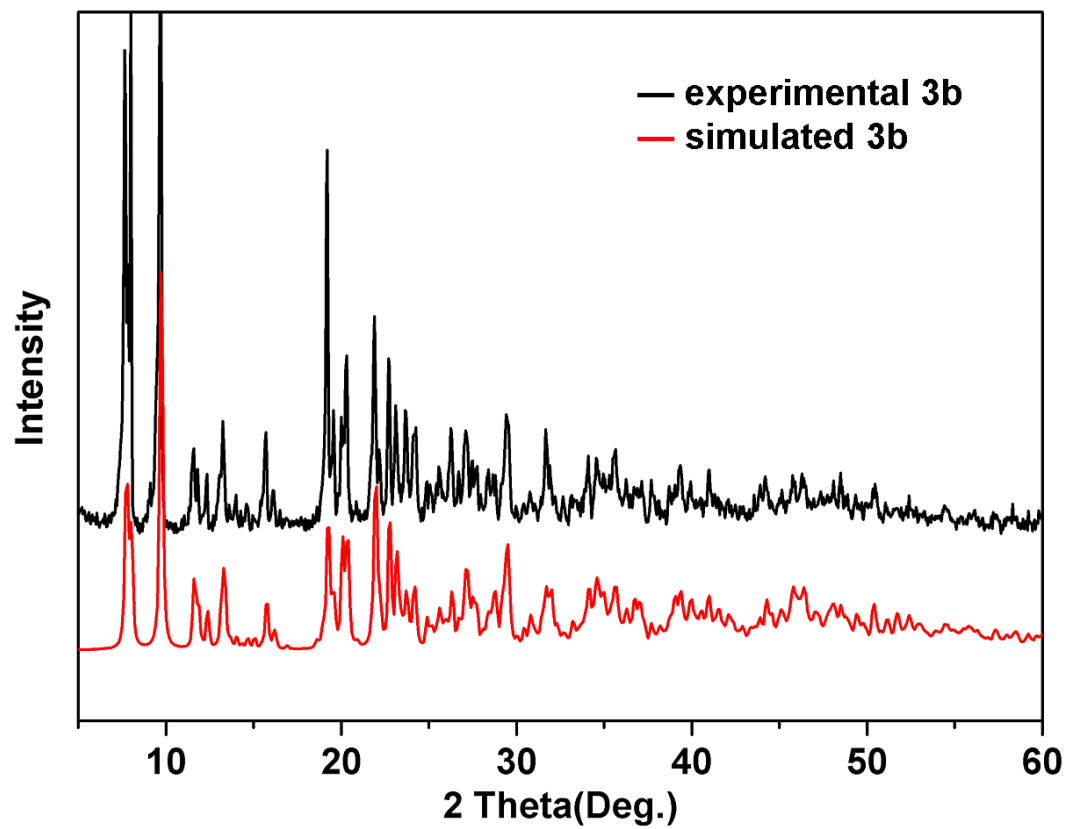

Fig. S1 Powder X-ray diffractions for simulated and experimental 1a-3b.



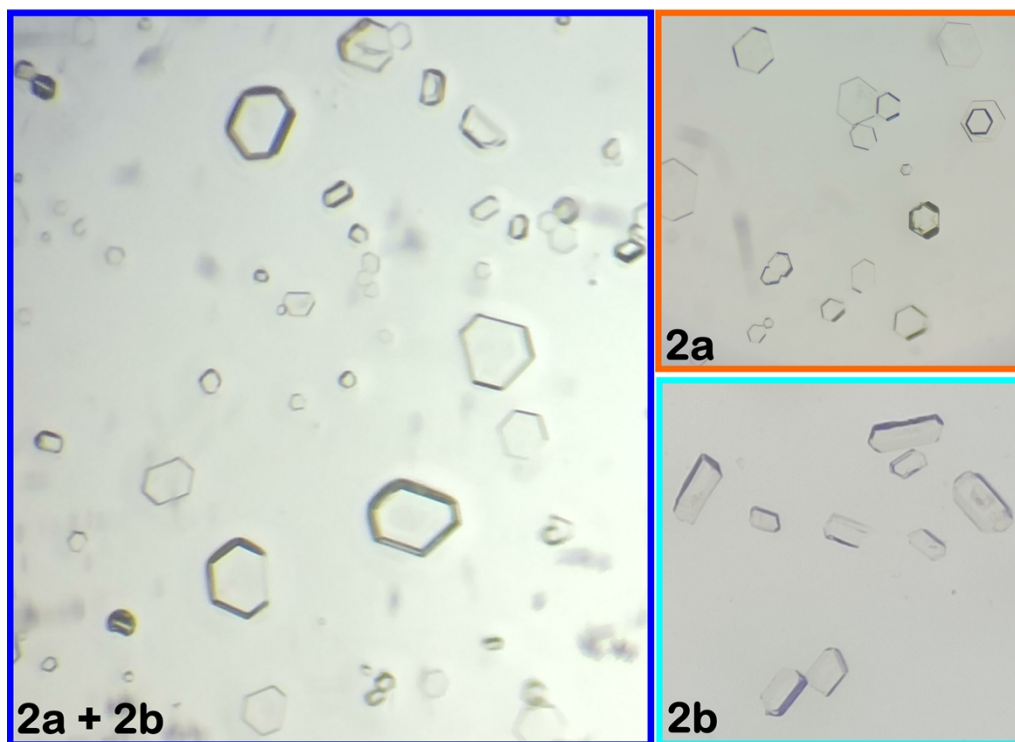

**Fig. S2.** one-pot synthesized rod crystal **2a** and hexagonal crystal **2b** (in the blue box); purified and separated crystal **2a** (in the orange box); purified and separated crystal **2b** (in the turquoise box).
